# Supplementary material for: β-Sitosterol and stigmasterol ameliorate dextran sulfate sodium-induced colitis in mice fed a high fat Western-style diet
Source: Royal Society of Chemistry journal article supplement (doi:10.1039/c7fo00375g), 2017-01-01
Supplement: c7fo00375g1.pdf [file c7fo00375g1.pdf]

1 Supplementary table S1. Compositions of Experimental Diets

2

|                                                                     | HFWD   | HFWD+0.4%<br>β-sitosterol | HFWD+0.4%<br>stigmasterol |
|---------------------------------------------------------------------|--------|---------------------------|---------------------------|
| Macronutrient Composition                                           |        |                           |                           |
| protein (% of energy)                                               | 20.00  | 20.00                     | 20.00                     |
| carbohydrate (% of energy)                                          | 20.00  | 20.00                     | 20.00                     |
| fat (% of energy)                                                   | 60.00  | 60.00                     | 60.00                     |
| energy(kcal/gm)                                                     | 23.40  | 23.40                     | 23.40                     |
| Ingredient                                                          |        |                           |                           |
| casein (g/kg)                                                       | 276.90 | 275.50                    | 274.60                    |
| L-cystine (g/kg)                                                    | 4.20   | 4.10                      | 4.10                      |
| maltodextrin (g/kg)                                                 | 173.10 | 172.52                    | 171.66                    |
| sucrose (g/kg)                                                      | 95.30  | 94.95                     | 94.48                     |
| soybean oil (g/kg)                                                  | 34.60  | 34.50                     | 34.33                     |
| lard (g/kg)                                                         | 339.20 | 338.13                    | 336.45                    |
| fiber (cellulose) (g/kg)                                            | 23.50  | 23.46                     | 23.35                     |
| mineral mix (no added calcium,<br>phosphorus, and potassium) (g/kg) | 6.90   | 6.90                      | 6.87                      |
| calcium(g/kg)                                                       | 0.42   | 0.42                      | 0.42                      |
| phosphorus(g/kg)                                                    | 6.29   | 6.26                      | 6.24                      |
| potassium (g/kg)                                                    | 8.24   | 8.26                      | 8.17                      |
| sodium chloride (g/kg)                                              | 3.58   | 3.57                      | 3.56                      |
| vitamin mix (no added vitamin D3<br>and folate) (g/kg)              | 13.80  | 13.80                     | 13.73                     |
| vitamin D3 (IU/g)                                                   | 0.14   | 0.14                      | 0.14                      |
| folate (mg/kg)                                                      | 0.28   | 0.28                      | 0.28                      |
| choline butartrate (g/kg)                                           | 1.40   | 1.40                      | 1.40                      |
| β-sitosterol(%)                                                     | 0.00   | 0.40                      | 0.00                      |
| stigmasterol(%)                                                     | 0.00   | 0.00                      | 0.40                      |

3 High-fat western-style diet (HFWD) was based on Chen et al.<sup>19</sup>

4

5

6

7
