# Supplementary material for: β-Sitosterol and stigmasterol ameliorate dextran sulfate sodium-induced colitis in mice fed a high fat Western-style diet
Source: Royal Society of Chemistry journal article supplement (doi:10.1039/c7fo00375g), 2017-01-01
Supplement: c7fo00375g2.pdf [file c7fo00375g2.pdf]

1

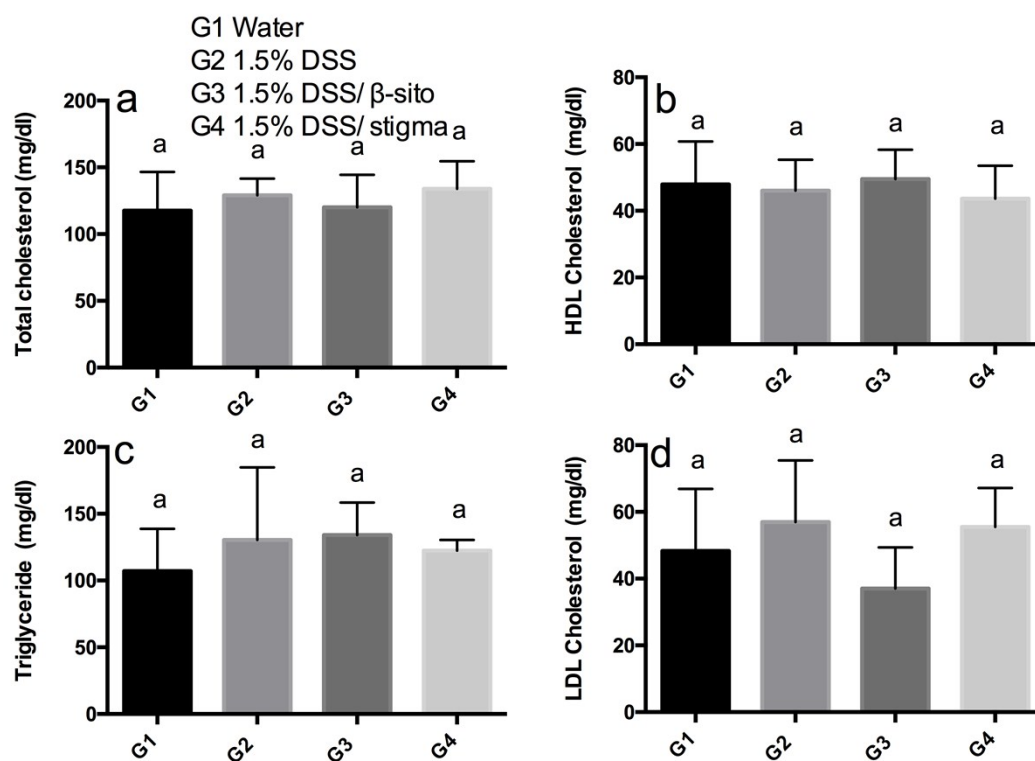

2

3 Supplementary Fig. S1 Total cholesterol, triglyceride, high-density lipoprotein  
4 cholesterol and low-density lipoprotein cholesterol concentration in DSS-treated mice  
5 (mean  $\pm$  SD, n=5). a, no significant difference among groups.

6
